# Supplementary material for: A 3-bp deletion of WLS5 gene leads to weak growth and early leaf senescence in rice
Source: PubMed Central journal article supplement (PMC6488631; doi:10.1186/s12284-019-0288-8), 2019-04-29
Supplement: 12284_2019_288_MOESM1_ESM.pdf [file 12284_2019_288_MOESM1_ESM.pdf]

# Fig. S1

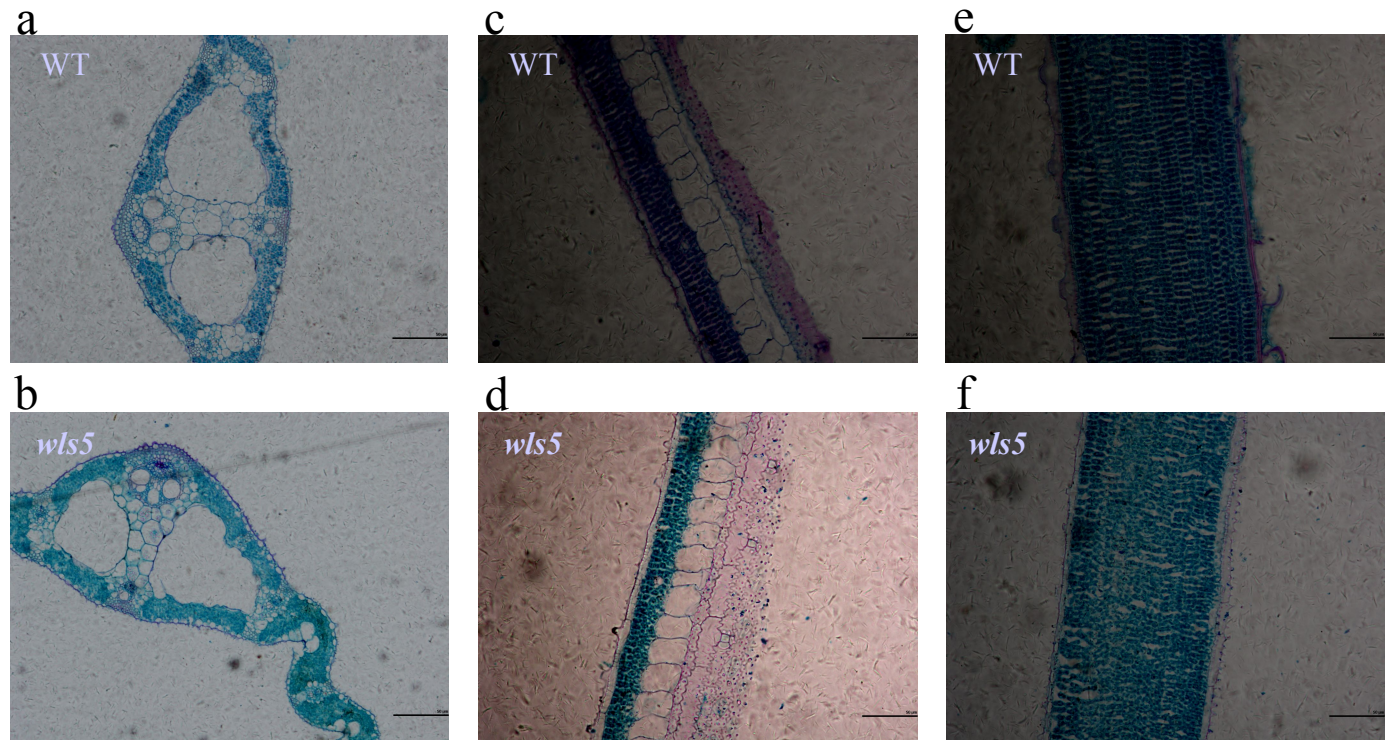

**Fig. S1** Histological characterization of leaves in wild-type and *wls5* plants. **a, b** Cross sections of leaves of wild-type ('93-11') and *wls5*. **c-f** Longitudinal sections of leaves of wild-type and *wls5* plants. Scale bar = 50  $\mu\text{m}$ .

**Fig. S2**

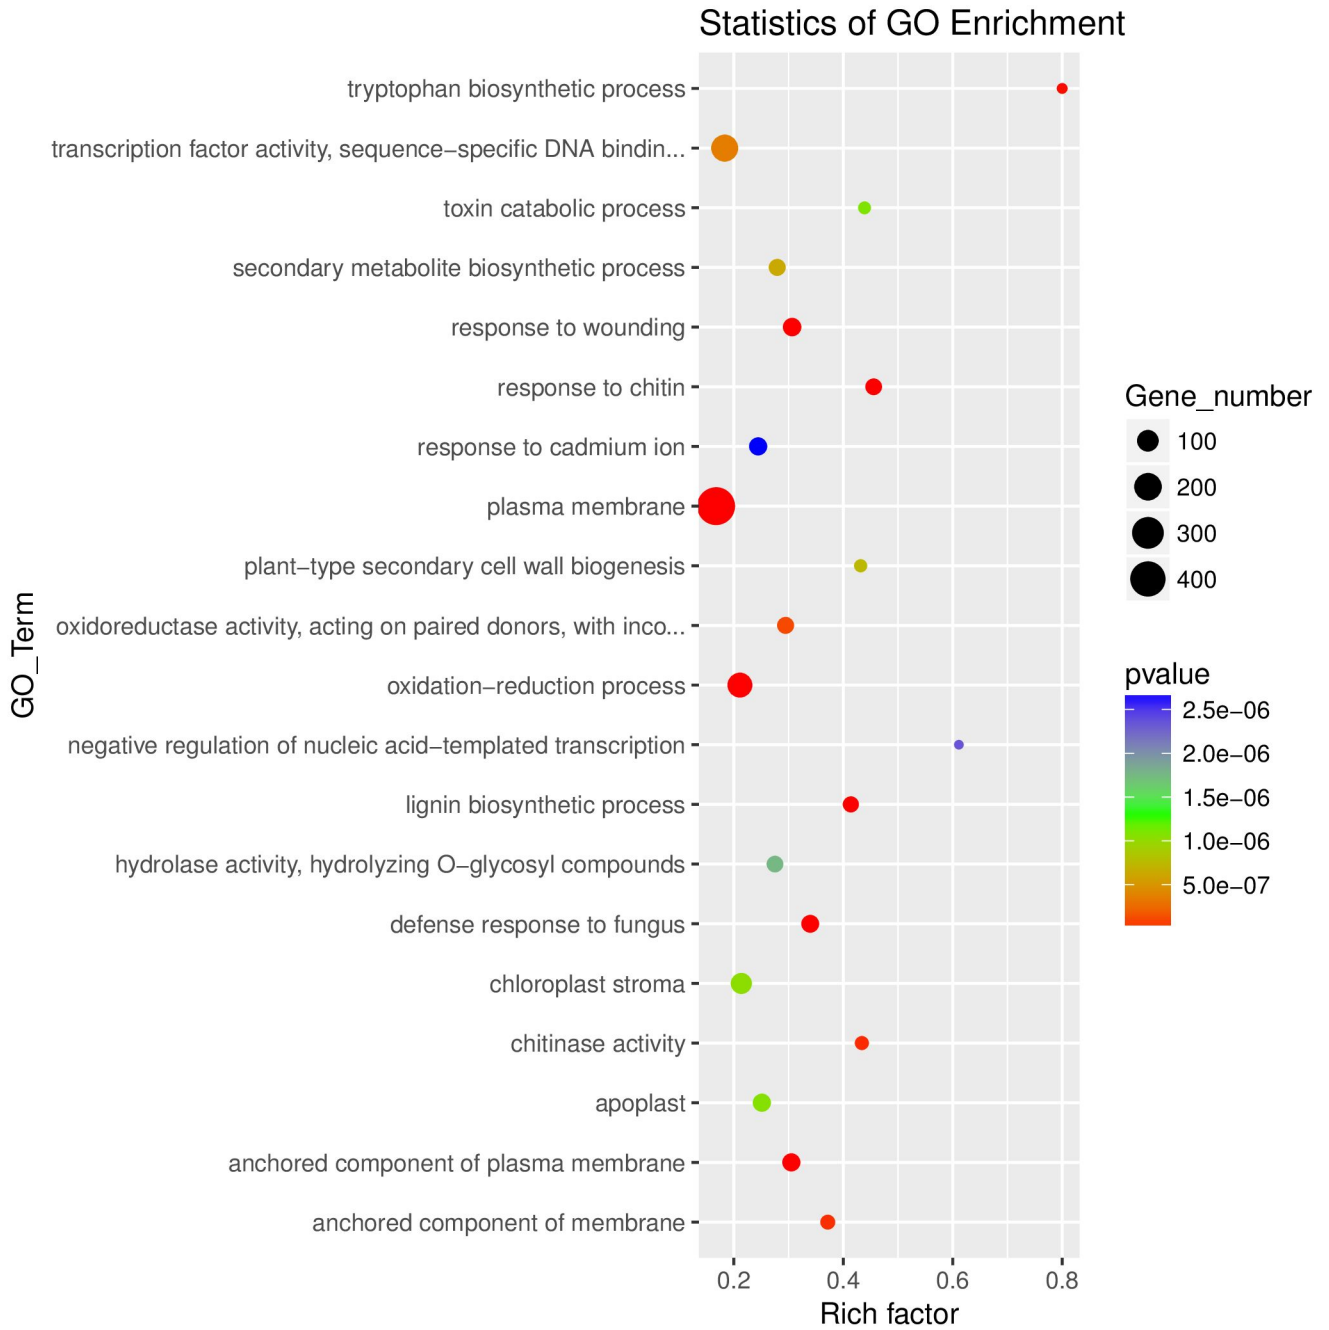

**Fig. S2** Statistics of GO enrichment analysis of differential expression genes between wild-type (WT) and *wls5* plants. mRNA was purified from total RNA isolated from tillering-stage plants of WT ('93-11') and *wls5*.

**Fig. S3**

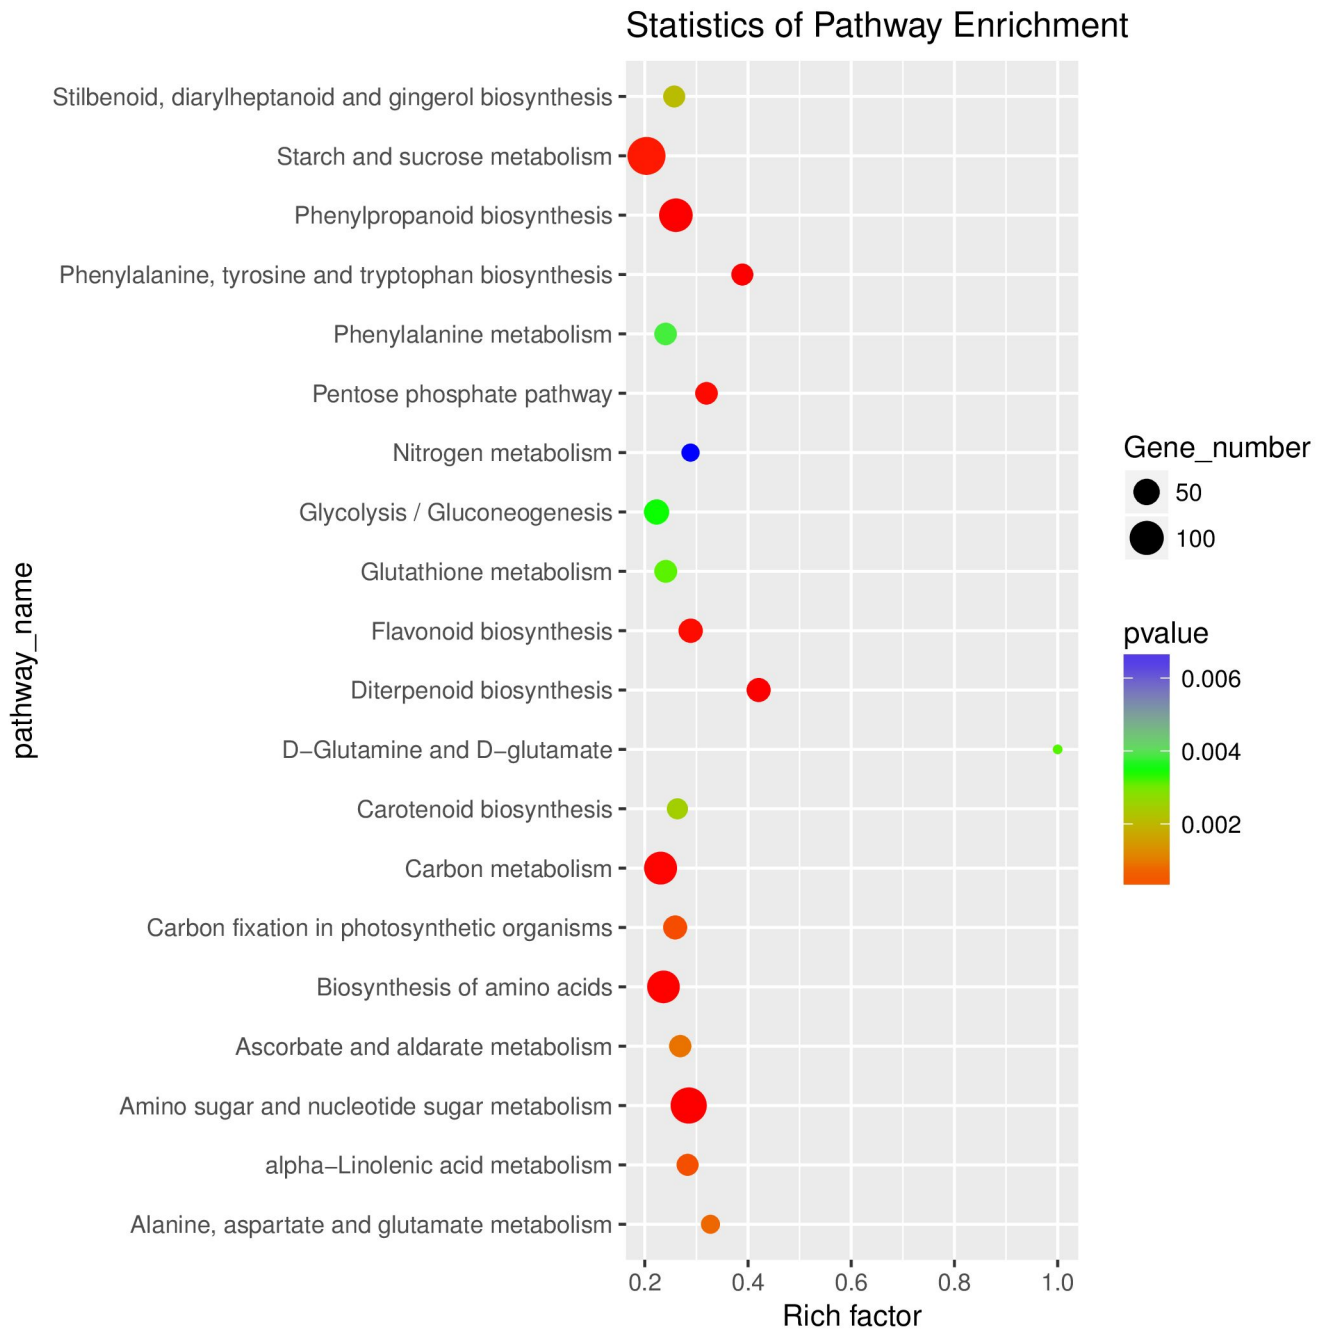

**Fig. S3** Statistics of pathway enrichment analysis of differential expression genes between wild-type (WT) and *wls5* plants. mRNA was purified from total RNA isolated from tillering-stage plants of WT ('93-11') and *wls5*.

**Fig. S4**

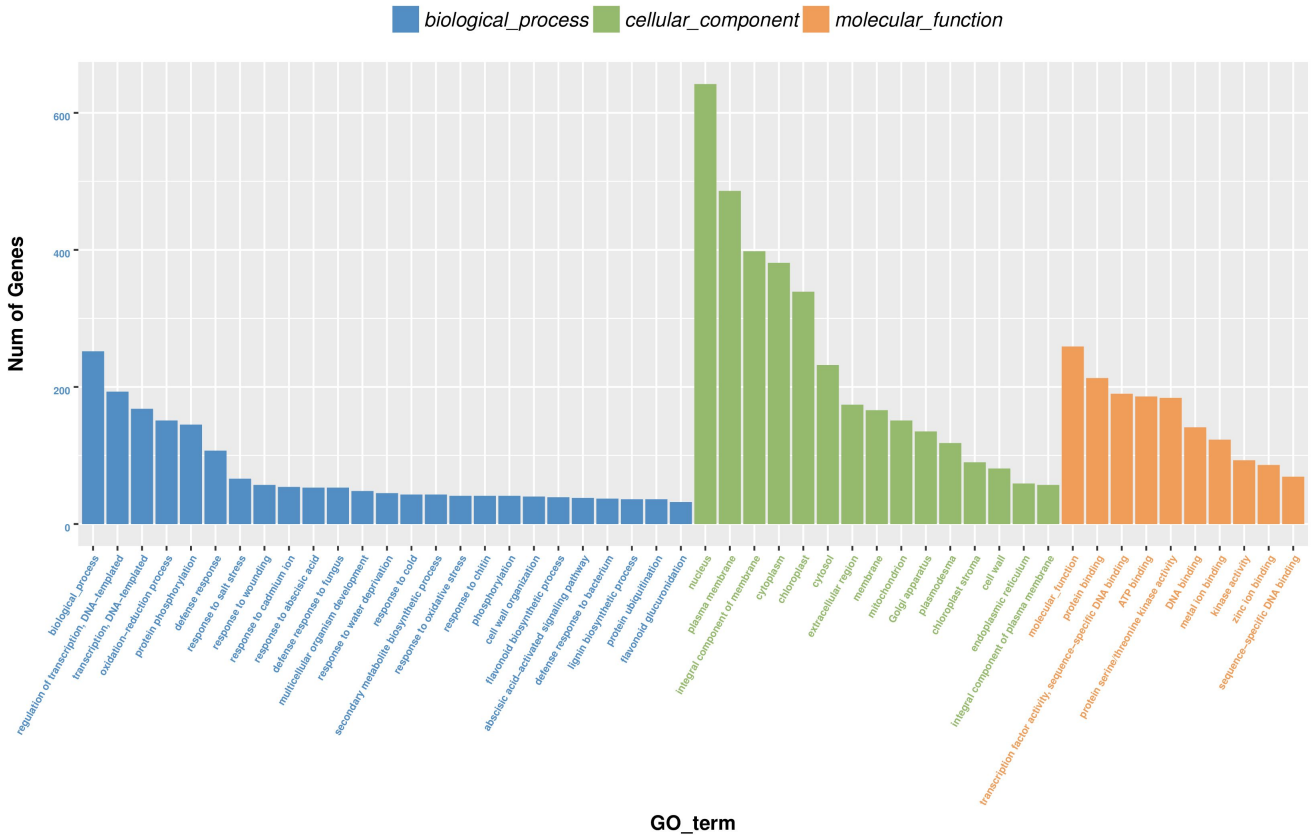

**Fig. S4** The number of differential expression genes involved in different biological processes, cellular components and molecular functions. mRNA was purified from total RNA isolated from tillering-stage plants of WT ('93-11') and *wls5*.
